# Supplementary material
Source: Springer Nature journal article supplement (https://www.springermedizin.de/resource/supplementary/12879_2003_65_MOESM2_ESM.pdf/9448082)

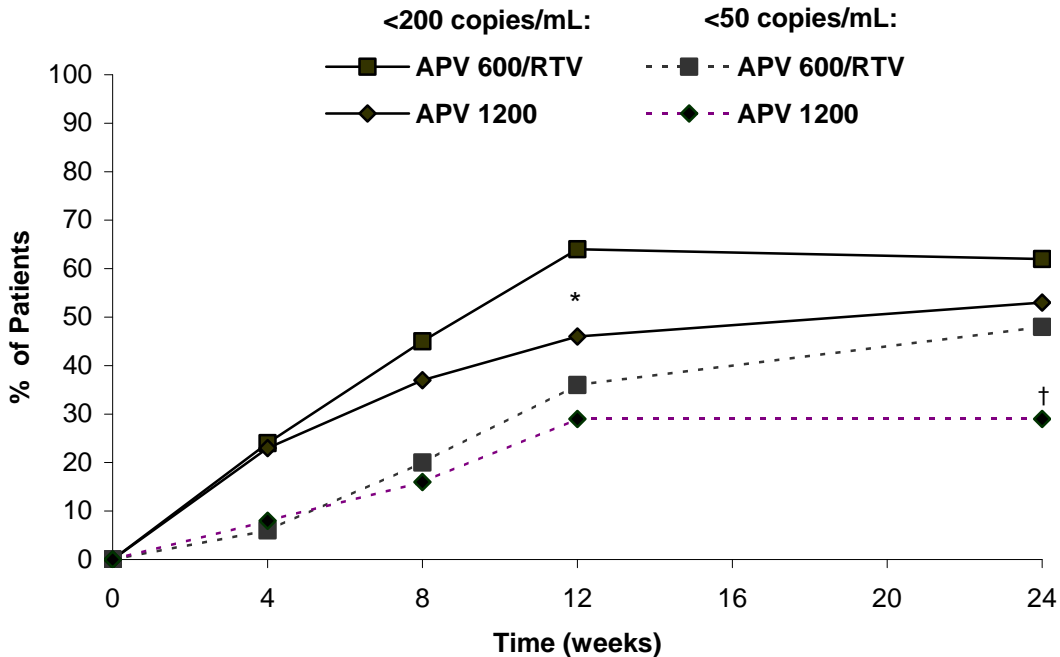

|            |     |     |     |     |     |
|------------|-----|-----|-----|-----|-----|
| APV600/RTV |     |     |     |     |     |
| n =        | 158 | 140 | 125 | 131 | 118 |
| APV 1200   |     |     |     |     |     |
| n =        | 53  | 48  | 43  | 41  | 38  |

\*p=0.044

†p=0.042

Supplement: MOESM2 [file 9448082]
